# Supplementary material for: What is below the support layer affects carbon nanotube growth: an iron catalyst reservoir yields taller nanotube carpets
Source: Royal Society of Chemistry journal article supplement (doi:10.1039/c3nr05240k), 2013-11-14
Supplement: c3nr05240k.pdf [file c3nr05240k.pdf]

# What is Below the Support Layer Affects Carbon Nanotube Growth: an Iron Catalyst Reservoir Yields Taller Nanotube Carpets

*Efrat Shawat<sup>1</sup>, Vladislav Mor<sup>3</sup>, Landon Oakes<sup>2</sup>, Yafit Fleger<sup>1</sup>, Cary L. Pint<sup>2</sup>, and Gilbert D. Nessim<sup>1,\*</sup>*

<sup>1</sup> Department of Chemistry and Institute for Nanotechnology, Bar-Ilan University, Ramat Gan, 52900, Israel

<sup>2</sup>Department of Mechanical Engineering and Interdisciplinary Materials Science Program, Vanderbilt University, Nashville, TN 37235, USA

<sup>3</sup> Department of Physics and Institute for Nanotechnology, Bar-Ilan University, Ramat Gan, 52900, Israel

## Supporting Information:

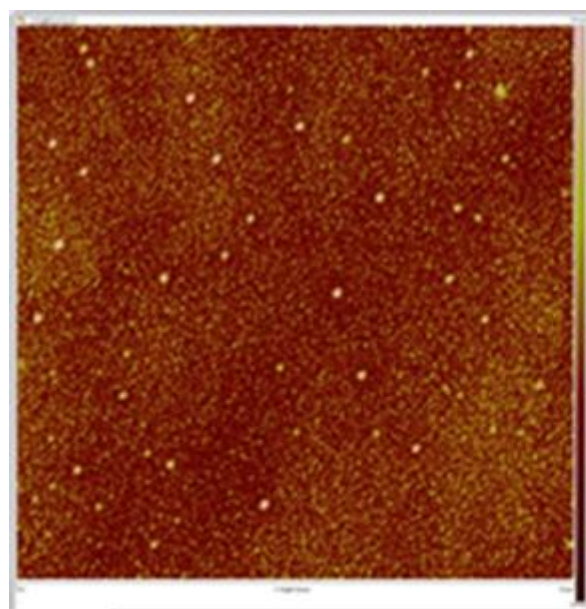

Si/Fe=10nm Al<sub>2</sub>O<sub>3</sub>=3nm/Fe=1.2nm

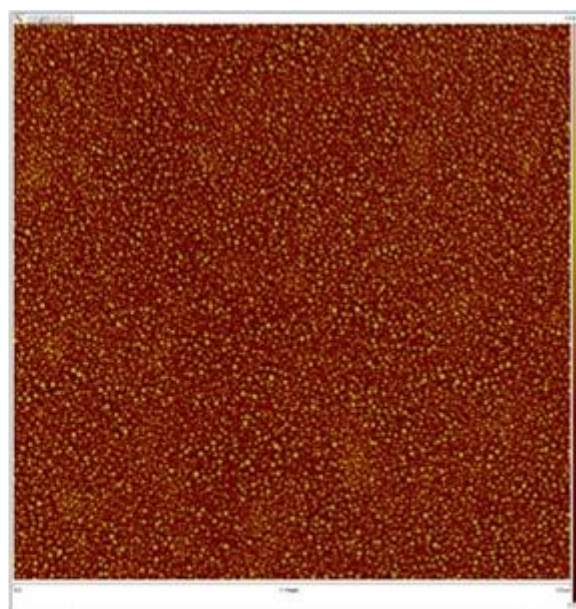

Si/Al<sub>2</sub>O<sub>3</sub>=3nm/Fe=1.2nm

**Figure 1** AFM measurements of samples annealed for 10 minutes at 790°C with and without reservoir. We can observe the large particles on the sample with the Fe reservoir.

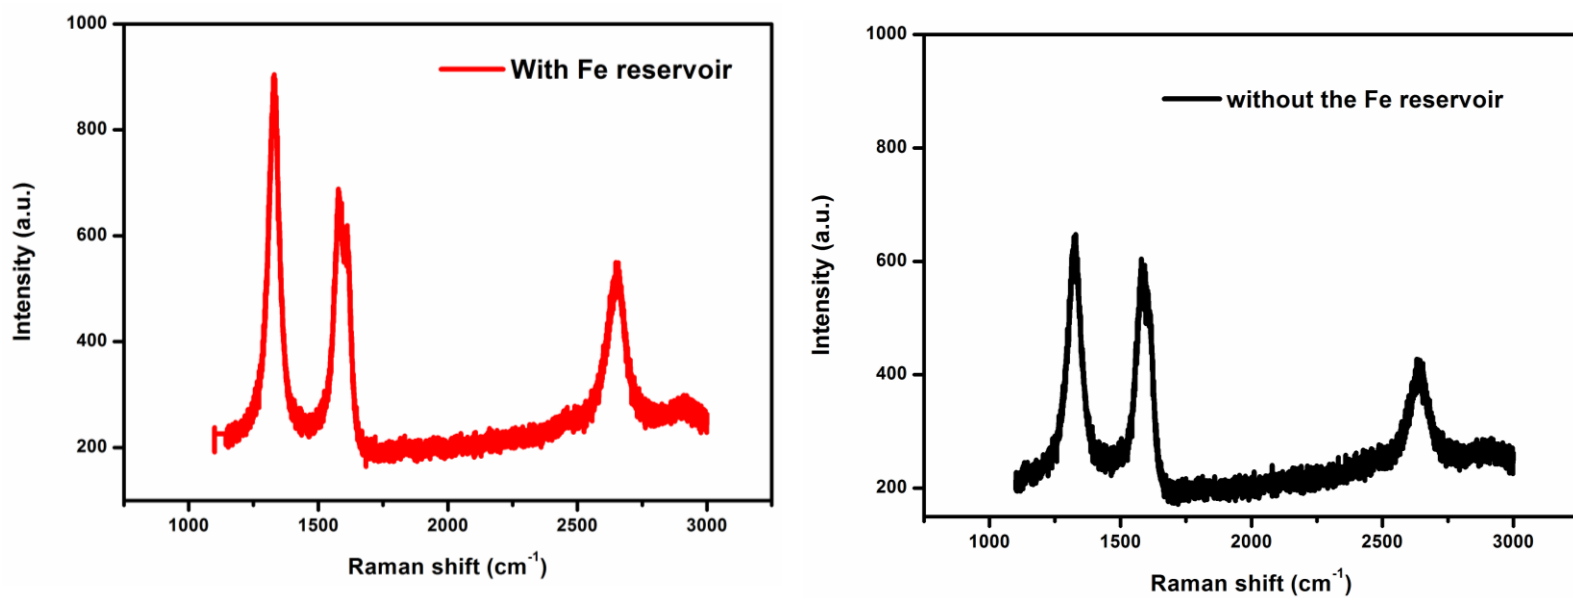

**Figure 2** Raman spectroscopy measurements taken samples with and without Fe reservoir after 5 min anneal at 790°C. The G/D ratios are comparable

**5 min anneal at 790 degrees- with "Fe reservoir"**

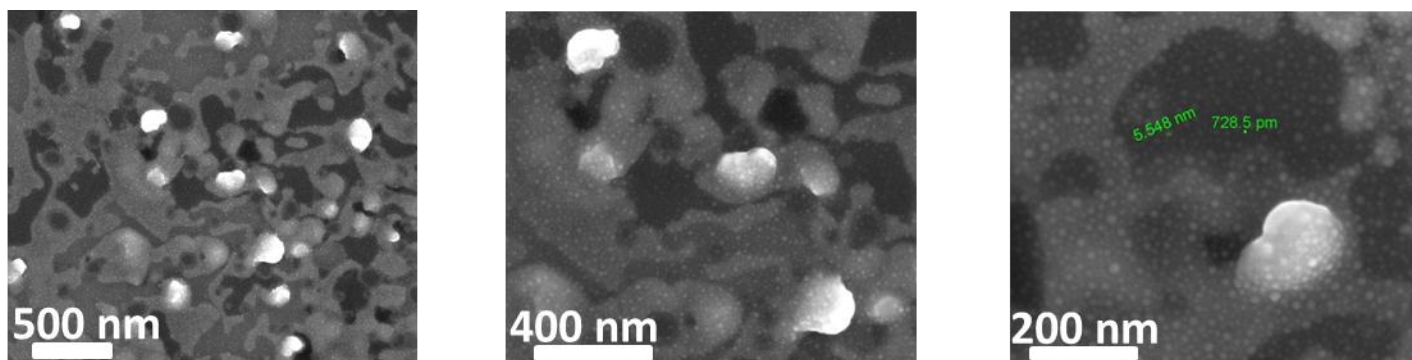

**5 min anneal at 790 degrees- without "Fe reservoir"**

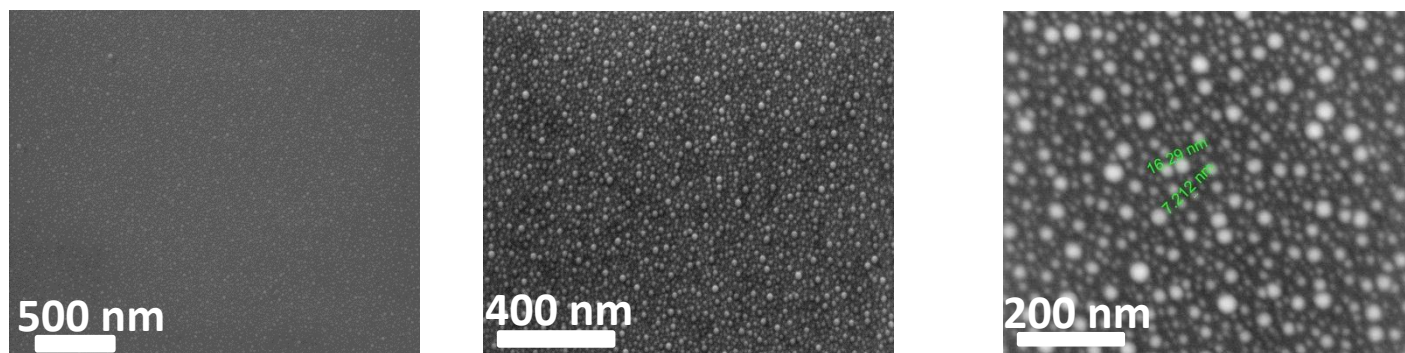

**Figure 3** (a) and 2(b) show top-view HRSEM images taken for both Fe reservoir and the non-Fe reservoir samples, respectively, after a 5 minute annealing period, at 790<sup>0</sup> (the magnifications are 50,000, 100,000 and 200,000 respectively).

### With Fe “reservoir”

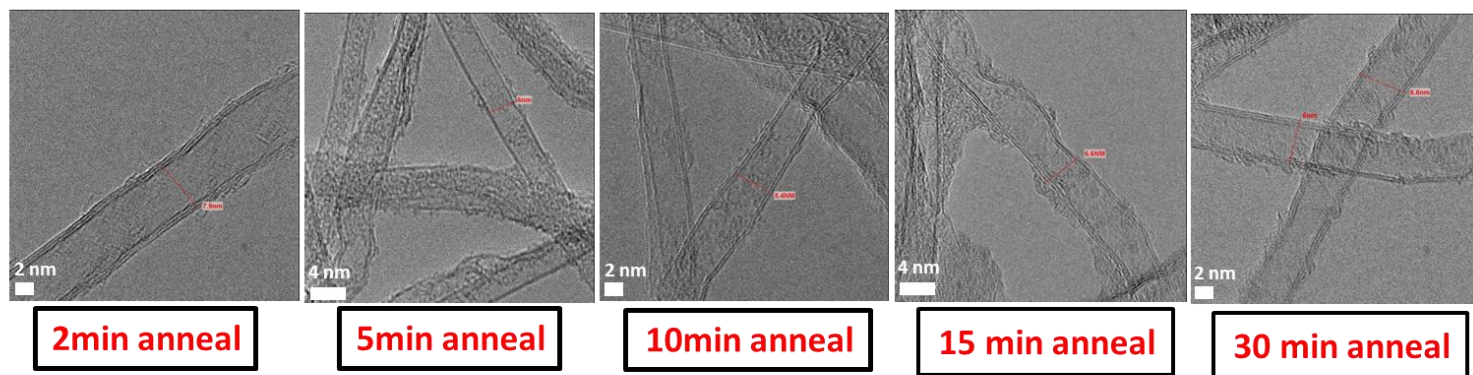

### Without Fe “reservoir”

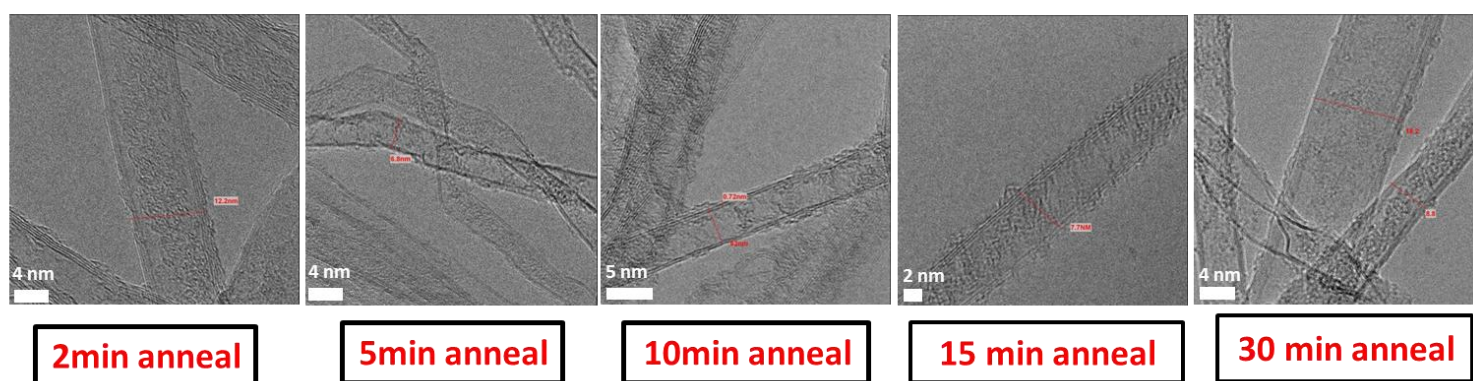

**Figure 5** HRTEM images showing the crystalline CNT structure for samples with and without the Fe reservoir for annealing durations between 2-30 min. We can see that the CNT diameters are smaller for the sample with the Fe reservoir compared with the non-reservoir sample. This result correlates with the annealing experiments and support the mechanism described in the text.



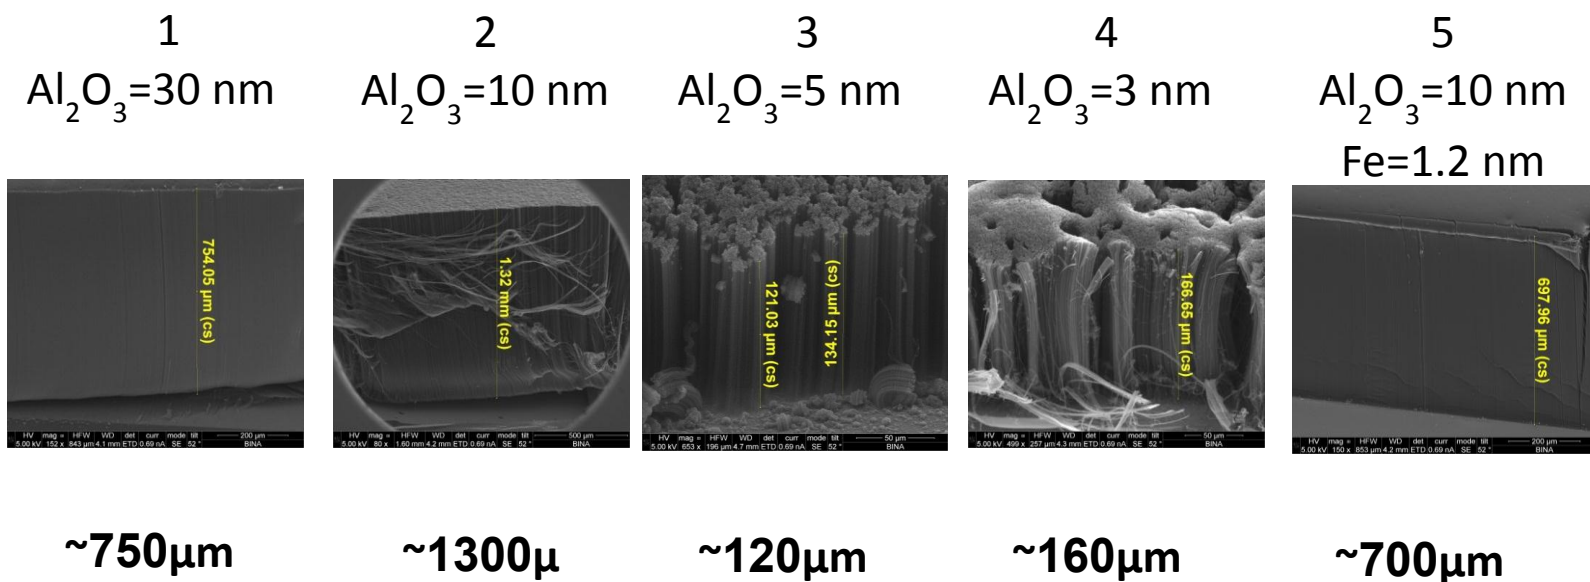

**Figure 6** SEM images showing the CNT carpets for samples with and without the Fe reservoir with 5 min anneal for 15 min growth durations at  $790^\circ$ . (1) Fe 10 nm/ $\text{Al}_2\text{O}_3$  30 nm/Fe 1.2 nm (2) Fe 10 nm/ $\text{Al}_2\text{O}_3$  10nm/Fe 1.2 nm (3) Fe 10 nm/ $\text{Al}_2\text{O}_3$  5nm/Fe 1.2 nm (4) Fe 10 nm/ $\text{Al}_2\text{O}_3$  3nm/Fe 1.2 nm (5)  $\text{Al}_2\text{O}_3$  3nm/Fe 1.2 nm

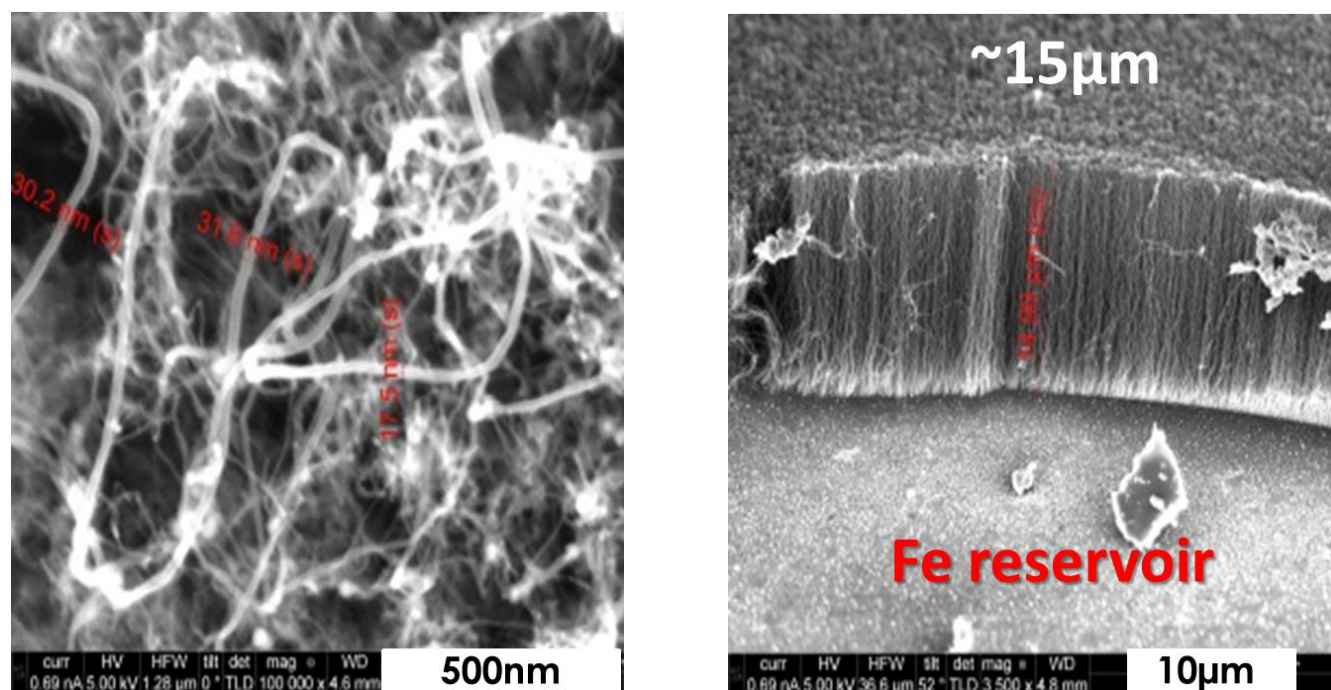

**Figure 7** SEM images showing the result of a 5 minute anneal followed by a 20 second growth (at 790 °C). The sample without reservoir (left) exhibited only micron-long entangled CNTs while the sample with reservoir (right) exhibited a 15 μm-tall carpet of vertically aligned CNTs.
